# Supplementary material
Source: Springer Nature journal article supplement (https://www.springermedizin.de/resource/supplementary/12995_2009_108_MOESM1_ESM.pdf/9622694)
Supplement: MOESM1 [file 9622694]

Total health care workers in 2001  
3,075 subjects

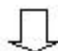

Completed two consecutive tuberculin tests  
871 subjects (28.3%)

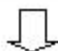

Fixed workplace  
624 subjects (71.6%)

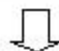

Variable workplaces  
247 subjects (28.4%)

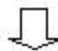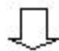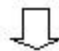

Conversion  
163 subjects (26.1%)

No conversion  
461 subjects (73.9%)

Excluded
